# Supplementary material for: Microfluidic qPCR for detection of 21 common respiratory viruses in children with influenza-like illness
Source: PubMed Central journal article supplement (PMC11569225; doi:10.1038/s41598-024-79407-x), 2024-11-16
Supplement: 41598_2024_79407_MOESM1_ESM.pdf [file 41598_2024_79407_MOESM1_ESM.pdf]

**Microfluidic qPCR for Detection of 21 Common Respiratory Viruses in Children with Influenza-like Illness**

**Notes**

To compare: qPCR - single-plex, qPCR - multiplex, Fluidigm 192.24  
 1 run = 96 samples in duplicate and 22 targets  
 Calculate cost per 96 sample run and per sample  
 Largest bulk options selected for pricing across everything  
 All process are costed to be performed manually i.e. without robotic automation.  
 January 2024

| Run definition                         | 1 run |
|----------------------------------------|-------|
| All samples (inc. blanks and controls) | 96    |
| Patient samples                        | 93    |
| Targets                                | 22    |
| Replicates                             | 2     |
| Multiplexing                           | 4     |

| Product                                                                                         | Product ID   | Product uses | Product price | qPCR singleplex |              | qPCR multiplex |              | Fluidigm     |              | Notes                                                                                                          |
|-------------------------------------------------------------------------------------------------|--------------|--------------|---------------|-----------------|--------------|----------------|--------------|--------------|--------------|----------------------------------------------------------------------------------------------------------------|
|                                                                                                 |              |              |               | Uses per run    | Cost per run | Uses per run   | Cost per run | Uses per run | Cost per run |                                                                                                                |
| NEB LunaScript® RT SuperMix Kit                                                                 | E3010L       | 100          | £471.00       | 1056            | £4,973.76    | 264            | £1,243.44    | 96           | £452.16      | 4ul per sample                                                                                                 |
| Azenta Life Sciences FrameStar 96 Well Skirted Low Profile PCR Plates - Clear Wells/Clear Frame | 4lx-0960/C   | 50           | £148.56       | 22              | £25.37       | 6              | £17.83       | 4            | £11.88       | 1xRT + 2xPreAmp + 1xPreLoading                                                                                 |
| Applied Biosystems™ MicroAmp™ Optical 96-Well Reaction Plate                                    | 4316813      | 500          | £2,310.00     | 44              | £203.28      | 11             | £50.82       | 0            | £0.00        |                                                                                                                |
| Applied Biosystems™ TaqMan™ Fast Advanced Master Mix for qPCR                                   | 4444558      | 5000         | £3,390.00     | 4224            | £2,863.87    | 1056           | £715.97      | 38.4         | £26.04       | 2ul used instead of 10ul so divided by 5                                                                       |
| Starlab 10/20 µl XL graduated TipOne® Filter Tip (sterile)                                      | S1120-3810-C | 80           | £757.93       | 154             | £1,459.02    | 39             | £369.49      | 10           | £94.74       | as boxes of 96 tips                                                                                            |
| Starlab 20 µl UltraPoint® graduated TipOne® Filter Tip, Natural, (sterile)                      | S1123-1810-C | 80           | £744.30       | 22              | £204.08      | 6              | £35.82       | 3            | £27.91       | as boxes of 96 tips                                                                                            |
| Starlab 200 µl graduated TipOne® Filter Tip, Natural (sterile)                                  | S1120-8810-C | 80           | £744.30       | 1               | £9.30        | 1              | £9.30        | 2            | £18.61       | as boxes of 96 tips                                                                                            |
| Standard Biotools Preamp Master Mix—5 Tubes                                                     | 100-5581     | 200          | £1,200.00     | 0               | £0.00        | 0              | £0.00        | 192          | £1,152.00    | Increased PreAmp usage results in 200 reactions from this product instead of 500 as stated by the manufacturer |
| Standard Biotools 192.24 GE IFC & 2X Reagent Kit - 50 IFCs                                      | 102-0583     | 50           | £23,100.00    | 0               | £0.00        | 0              | £0.00        | 1            | £462.00      |                                                                                                                |
| IDT 250nmole DNA Oligo X39                                                                      | -            | 31590000     | £1,365.00     | 7488            | £0.32        | 7488           | £0.32        | 8.58         | £0.00        | X39 ~450ul of 100uM                                                                                            |
| TaqMan custom MGB 6nmol probes X10                                                              | 4316034      | 1080000      | £3,480.00     | 1920            | £6.19        | 1920           | £6.19        | 2.2          | £0.01        | X10 60ul of 100uM                                                                                              |
| IDT 100nm PrimerTime S1 6-FAM/ZEN/3IBFQ custom probes X10                                       | -            | 7200000      | £920.00       | 1920            | £0.25        | 1920           | £0.25        | 2.2          | £0.00        | X10 ~400ul of 100uM                                                                                            |
| IDT SARS-CoV-2 (E) reverse primer IDT product E Sarbeco R2 Reverse Primer, 100 nmol             | 10006891     | 1800000      | £205.00       | 192             | £0.02        | 192            | £0.02        | 0.22         | £0.00        | 1000ul of 100uM                                                                                                |
| IDT SARS-CoV-2 (E) probe IDT product E Sarbeco P1 (FAM) Probe, 50 nmol                          | 10006893     | 900000       | £380.00       | 192             | £0.08        | 192            | £0.08        | 0.22         | £0.00        | 500ul of 100uM                                                                                                 |
| IDT RNase P forward primer IDT product RNase P Forward Primer Aliquot, 100 nmol                 | 10006836     | 1800000      | £205.00       | 192             | £0.02        | 192            | £0.02        | 0.22         | £0.00        | 1000ul of 100uM                                                                                                |
| IDT RNase P reverse primer IDT product RNase P Reverse Primer Aliquot, 100 nmol                 | 10006837     | 1800000      | £205.00       | 192             | £0.02        | 192            | £0.02        | 0.22         | £0.00        | 1000ul of 100uM                                                                                                |
| IDT RNase P probe IDT product RNase P (FAM) Probe Aliquot, 50 nmol                              | 10006838     | 900000       | £380.00       | 192             | £0.08        | 192            | £0.08        | 0.22         | £0.00        | 500ul of 100uM                                                                                                 |
| Eurofins Standard Gene - Viral Multiplex Control 1                                              | -            | 1300000      | £231.12       | 44              | £0.01        | 11             | £0.00        | 1            | £0.00        |                                                                                                                |
| IDT Gene 501-1500 bp -Viral Multiplex Control 2                                                 | -            | 980000       | £123.00       | 44              | £0.01        | 11             | £0.00        | 1            | £0.00        |                                                                                                                |
| IDT 2019-nCoV N Positive Control                                                                | 10006825     | 50000        | £68.00        | 44              | £0.06        | 11             | £0.01        | 1            | £0.00        |                                                                                                                |
| IDT Hs RPP30 Positive Control                                                                   | 10006828     | 50000        | £56.00        | 44              | £0.05        | 11             | £0.01        | 1            | £0.00        |                                                                                                                |
| IDT 2019-nCoV E Positive Control                                                                | 10006896     | 50000        | £69.00        | 44              | £0.06        | 11             | £0.02        | 1            | £0.00        |                                                                                                                |
